# Supplementary material for: The Seasonal-to-Multiyear Large Ensemble (SMYLE) Prediction System using the Community Earth System Model Version 2
Source: Copernicus journal article supplement (doi:10.5194/gmd-2022-60), 2022-03-16
Supplement: Supplementary file 1 [file gmd-2022-60-supplement.pdf]

**Supplemental Material for:**

## **The Seasonal-to-Multiyear Large Ensemble (SMYLE) Prediction System using the Community Earth System Model Version 2**

Stephen G. Yeager<sup>1</sup>, Nan Rosenbloom<sup>1</sup>, Anne Glanville<sup>1</sup>, Xian Wu<sup>1</sup>, Isla Simpson<sup>1</sup>, Hui Li<sup>1</sup>, Maria J. Molina<sup>1</sup>, Kristen Krumhardt<sup>1</sup>, Samuel Mogen<sup>2</sup>, Keith Lindsay<sup>1</sup>, Danica Lombardozzi<sup>1</sup>, Will Wieder<sup>1</sup>, Who M. Kim<sup>1</sup>, Jadwiga H. Richter<sup>1</sup>, Matthew Long<sup>1</sup>, Gokhan Danabasoglu<sup>1</sup>, David Bailey<sup>1</sup>, Marika Holland<sup>1</sup>, Nicole Lovenduski<sup>2</sup>, Warren G. Strand<sup>1</sup>

<sup>1</sup>National Center for Atmospheric Research, Boulder, Colorado, USA

<sup>2</sup>Department of Atmospheric and Oceanic Sciences, University of Colorado, Boulder, Colorado, USA

*Correspondence to:* Stephen G. Yeager (yeager@ucar.edu)

Contents:

Table S1

Figs. S1-S5

| Lead     | NA          | EP         | NWP         |
|----------|-------------|------------|-------------|
| 1-month  | <b>0.61</b> | <b>0.3</b> | <b>0.25</b> |
| 4-month  | <b>0.44</b> | 0.002      | 0.08        |
| 7-month  | 0.14        | 0.06       | <b>0.28</b> |
| 10-month | 0.14        | -0.17      | 0.07        |
| 13-month | 0.22        | -0.16      | 0.07        |
| 16-month | 0.19        | 0.03       | 0.05        |
| 19-month | 0.2         | -0.02      | 0.09        |

**Table S1: Similar to Table 1 of Main Text, but showing correlation coefficients of normalized seasonal-mean (JJASON) TC number between the observations and the SMYLE forecasts. Bold numbers indicate the correlations are significant at 90% confidence level. The correlations in the North Indian Ocean, the South Indian Ocean and the South Pacific Ocean are not significant at any leadtime and are therefore not shown.**

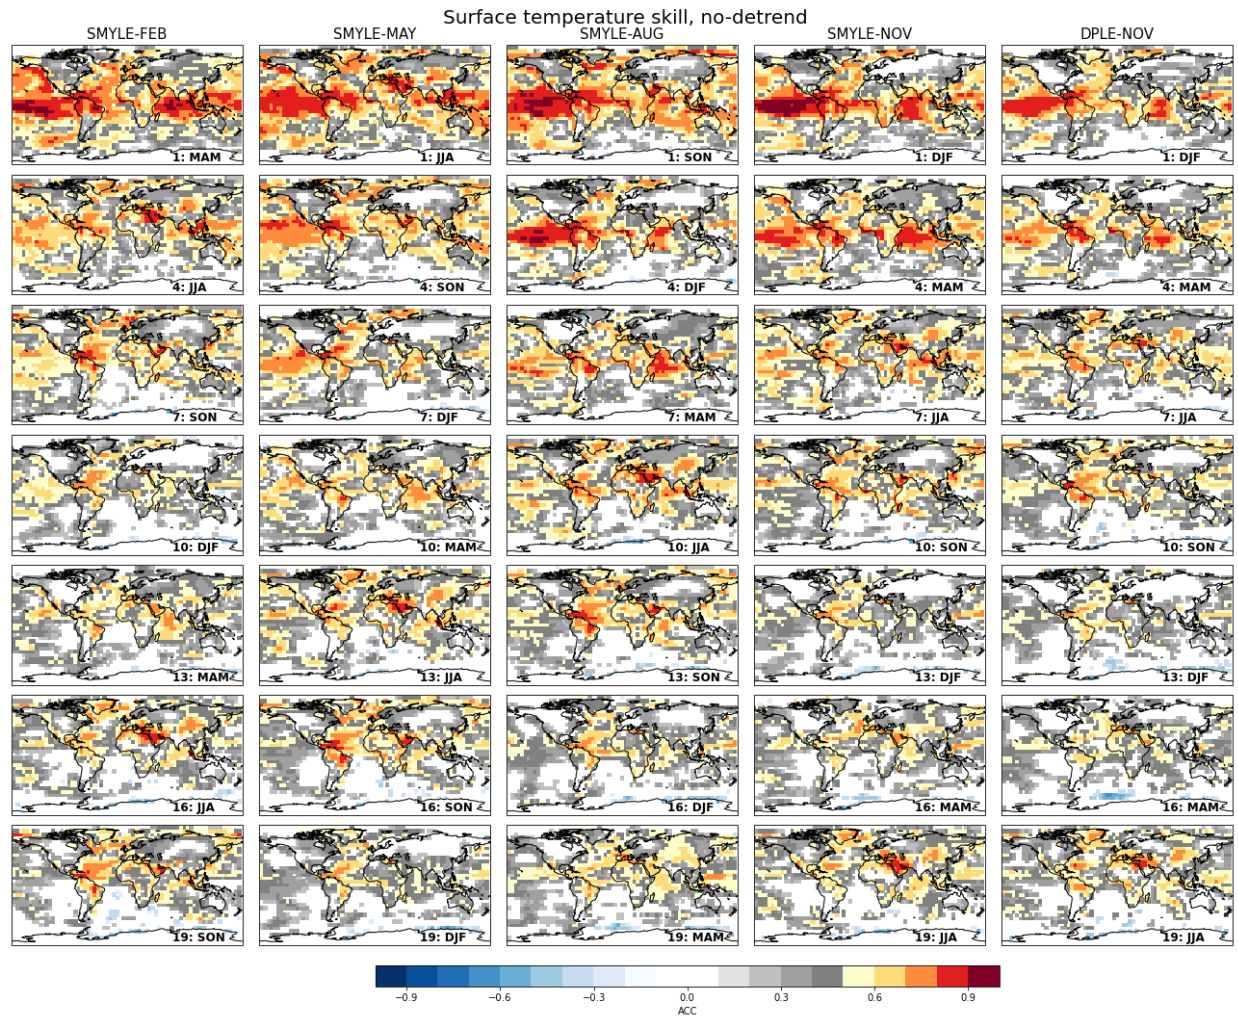

Fig. S1: Equivalent to Figure 1 but without removing a linear trend.

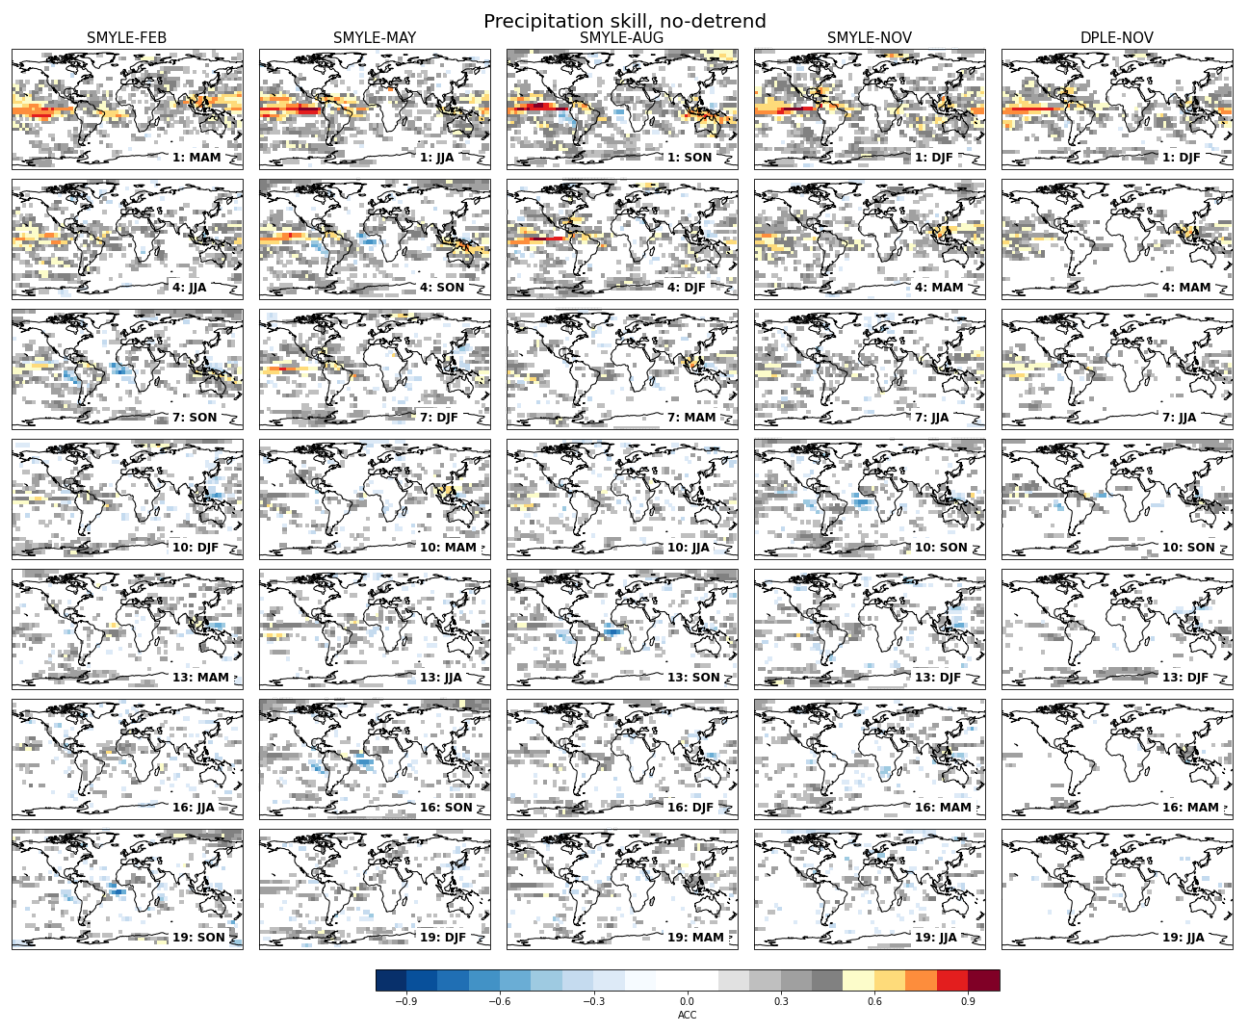

Fig. S2: Equivalent to Figure 2 but without removing a linear trend.

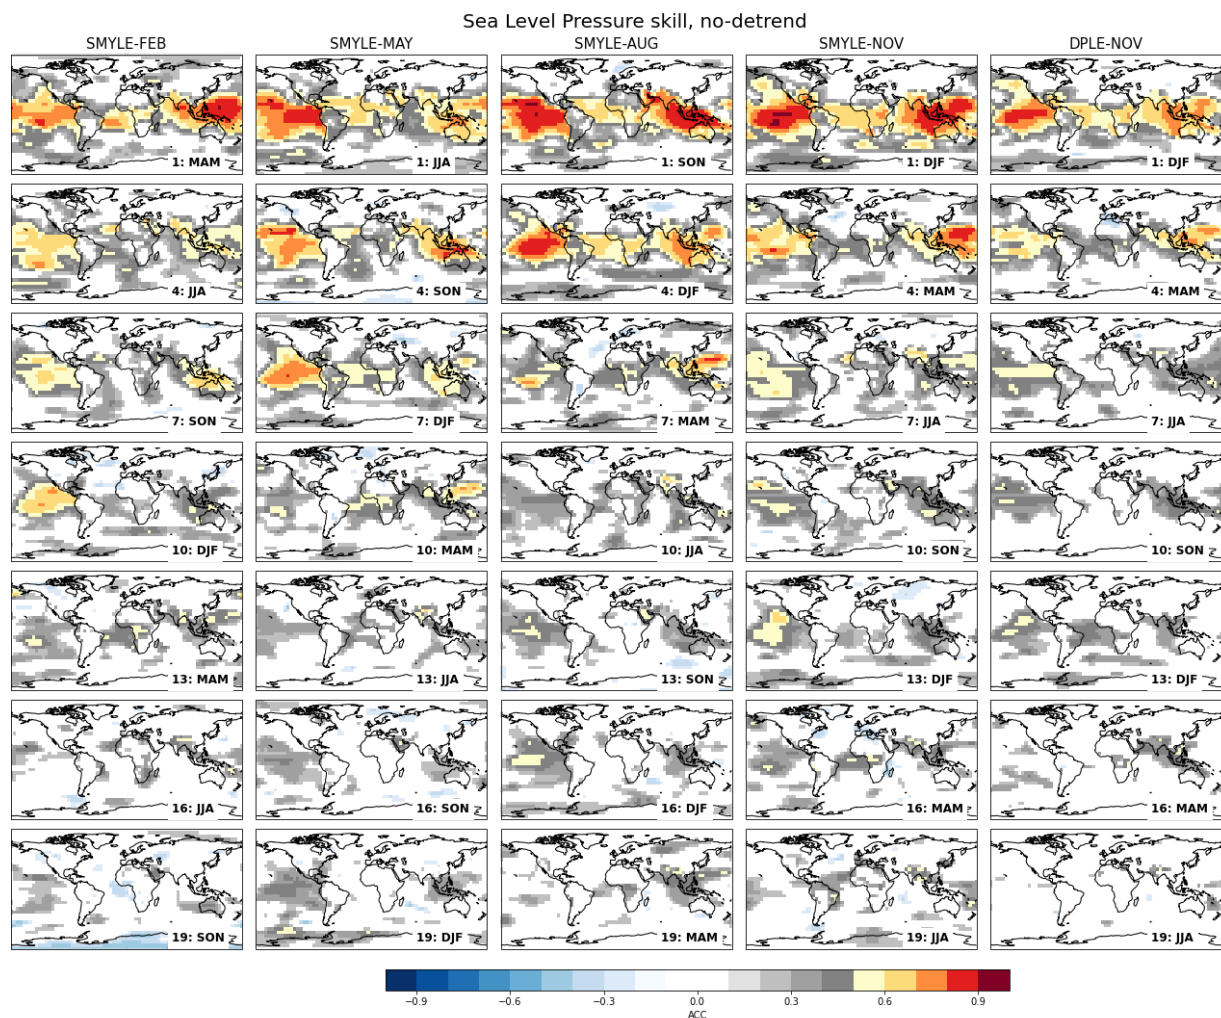

Fig. S3: Equivalent to Figure 6 but without removing a linear trend.

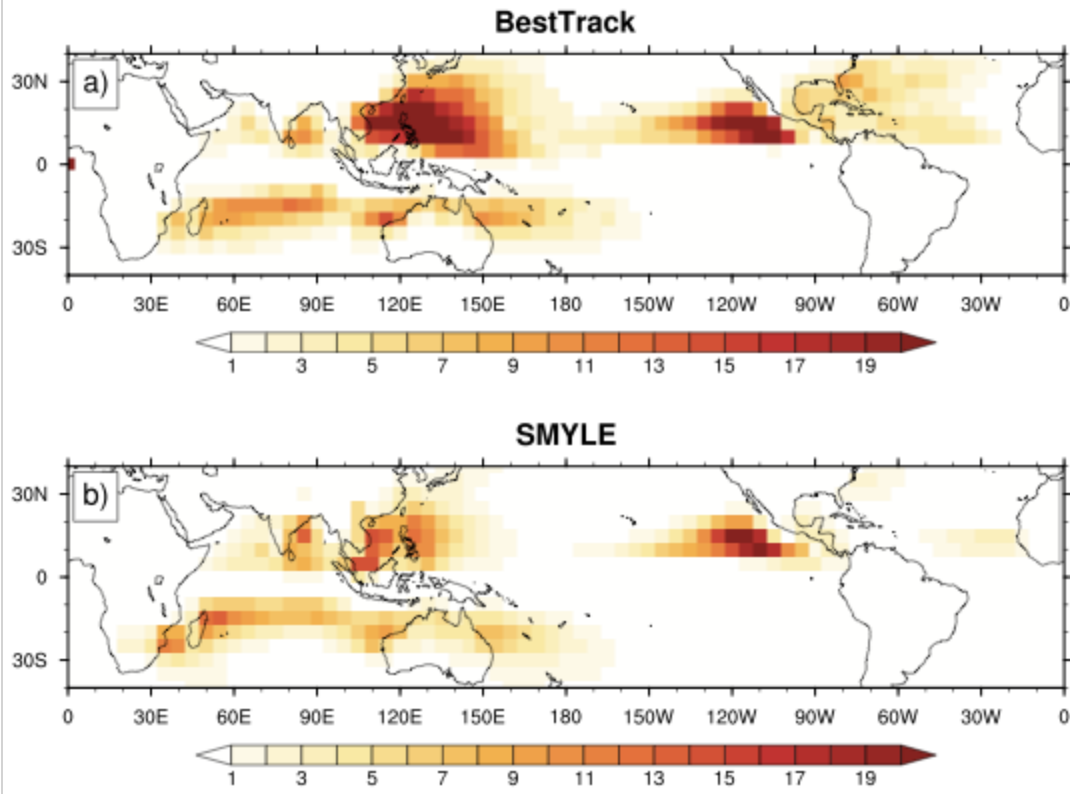

Fig. S4: Annual mean global TC track density (over 5°x5° box) during 1970-2018 in (a) observations and (b) SMYLE lead month 1 forecasts (averaged over 4 initialization times).

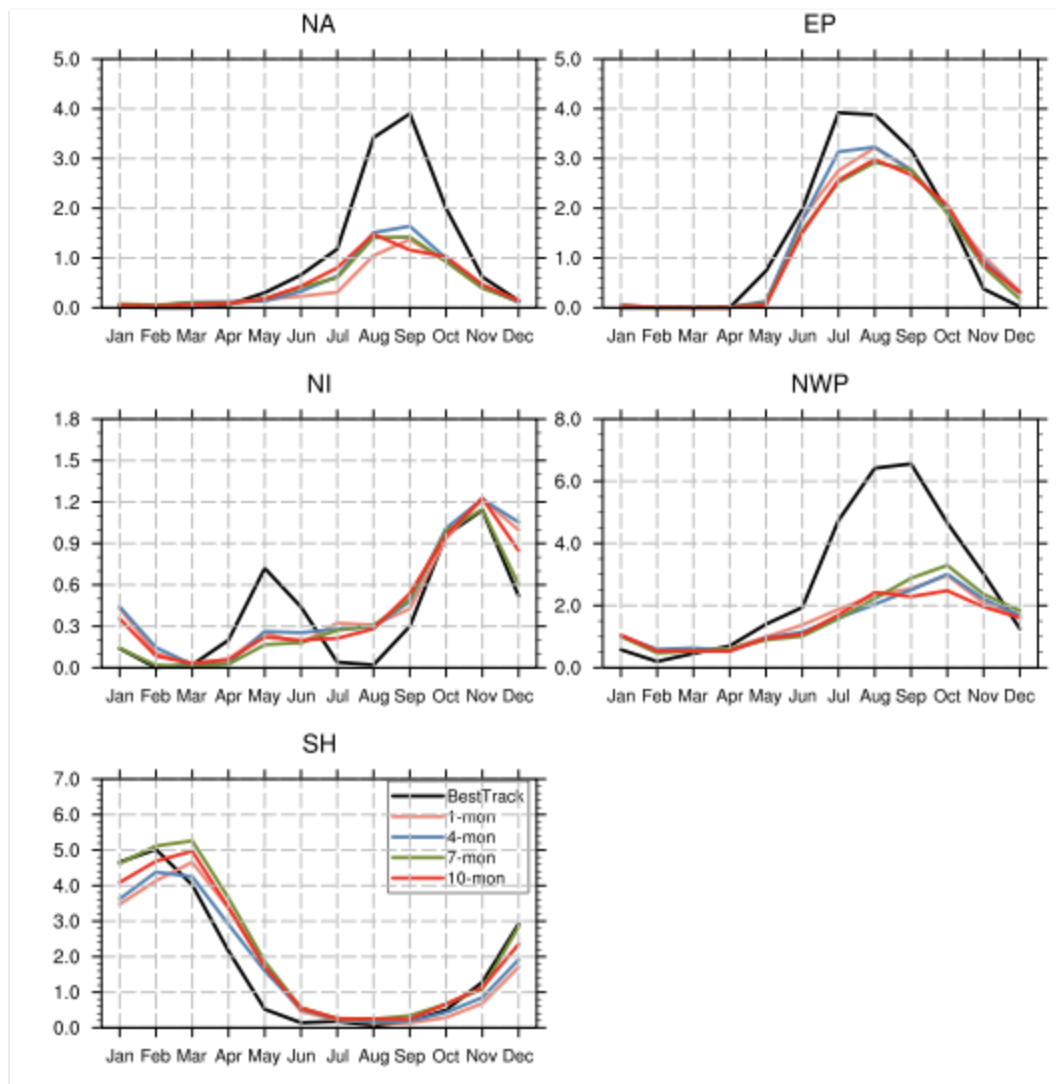

Fig. S5: Climatological mean TC number seasonality in observations (black curves) and SMYLE forecast at 1-month (orange), 4-month (blue), 7-month (green) and 10-month (red) lead time in different TC basins -- North Atlantic (NA), eastern Pacific (EP), North Indian Ocean (NI), Northwestern Pacific (NWP) and Southern Hemisphere (SH).
